# Supplementary material for: KLF4α stimulates breast cancer cell proliferation by acting as a KLF4 antagonist
Source: PubMed Central journal article supplement (PMC5216746; doi:10.18632/oncotarget.10058), 2016-06-15
Supplement: oncotarget-07-45608-s001.pdf [file oncotarget-07-45608-s001.pdf]

## KLF4 $\alpha$ stimulates breast cancer cell proliferation by acting as a KLF4 antagonist

### Supplementary Materials

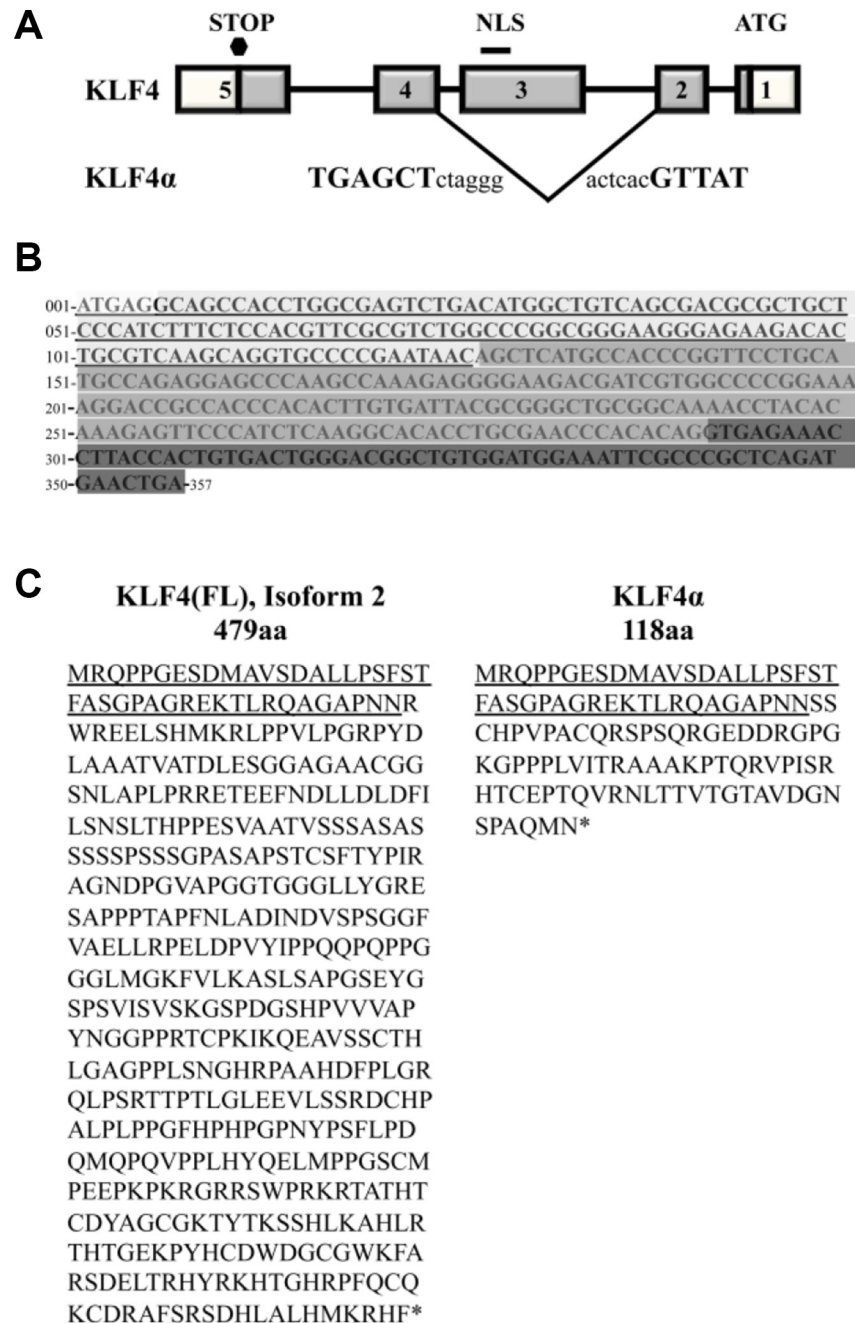

**Supplementary Figure S1: cDNA and protein sequence of KLF4 $\alpha$  in MDA-MB-231 cells.** (A) Schematic representation of the *KLF4* gene. Splicing site sequence for *KLF4 $\alpha$*  is indicated below. Letters in uppercase: exon part, letters in lowercase: intron part. (B) cDNA sequence of *KLF4 $\alpha$* . The different gray shades indicate the 4 different exons present. (C) Comparison of the *KLF4*(FL) and *KLF4 $\alpha$*  protein sequence. Underlined sequence: 42 aa, which are common between *KLF4 $\alpha$*  and *KLF4*(FL).

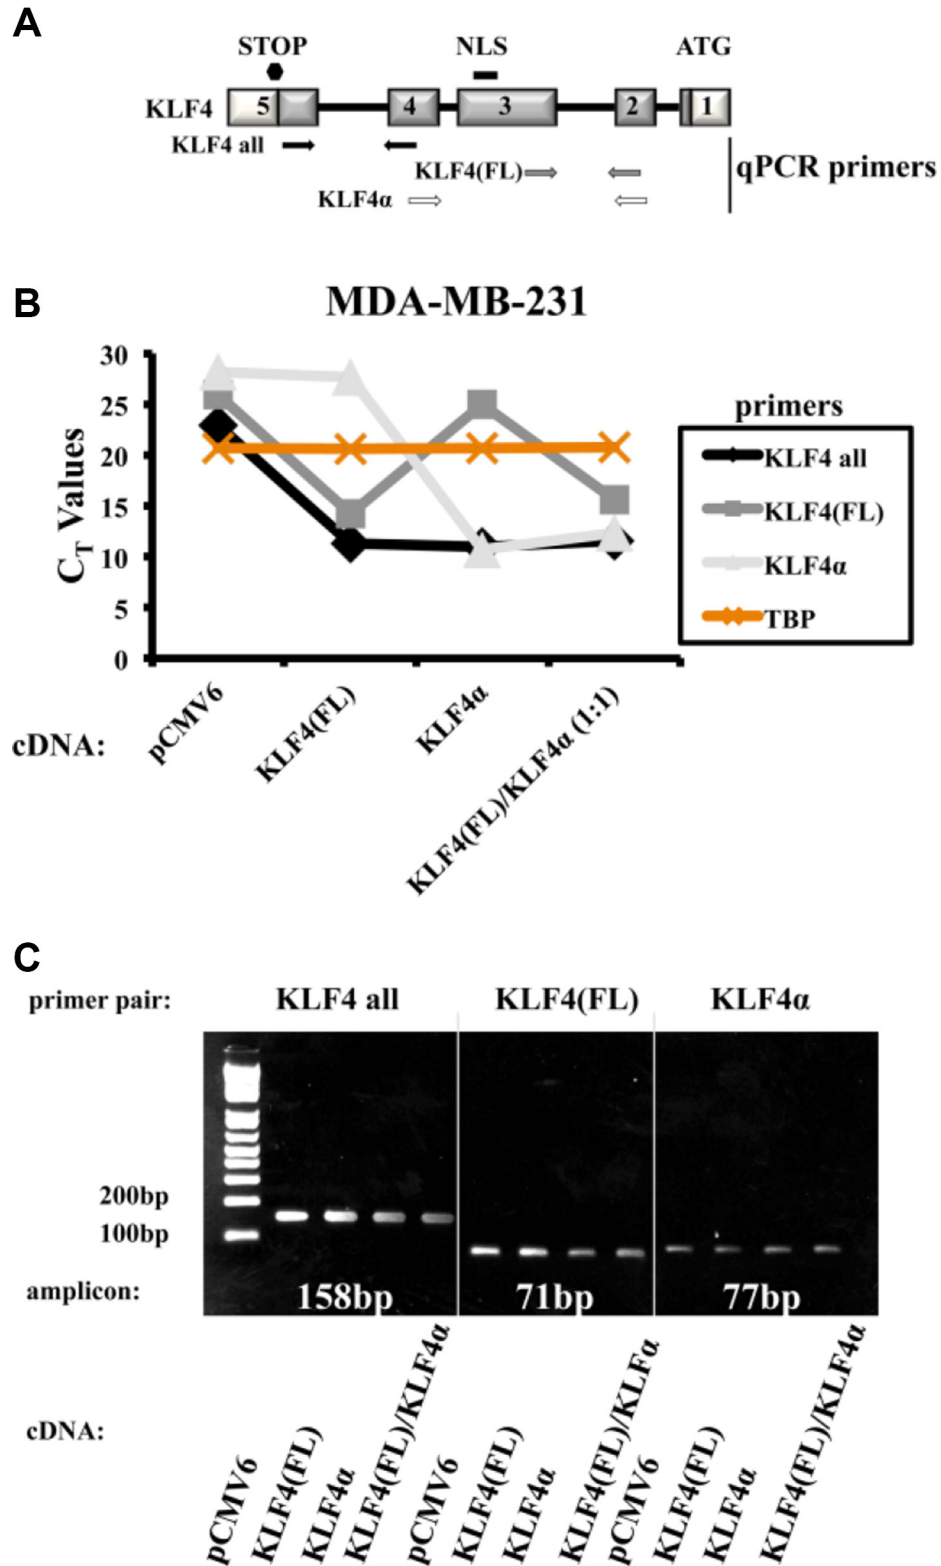

**Supplementary Figure S2: KLF4α primer specificity.** (A) Schematic representation of the *KLF4* gene and the binding sites of the specific primer pairs. (B) qPCR analysis of transiently transfected MDA-MB-231 cells with the expression plasmids pCMV6, KLF4(FL), KLF4α, and a 1:1 mix of KLF4(FL) and KLF4α 24 h after transfection using specific primers that recognize all KLF4 isoforms (*KLF4 all*), KLF4(FL) only (*KLF4(FL)*), and KLF4α (*KLF4α*). Note that the primers show the expected specificities. TBP: TATA-Box binding protein. (C) qPCR amplicons were analyzed on an agarose gel. For each primer pair, a single band was detectable corresponding to the expected size.

**A**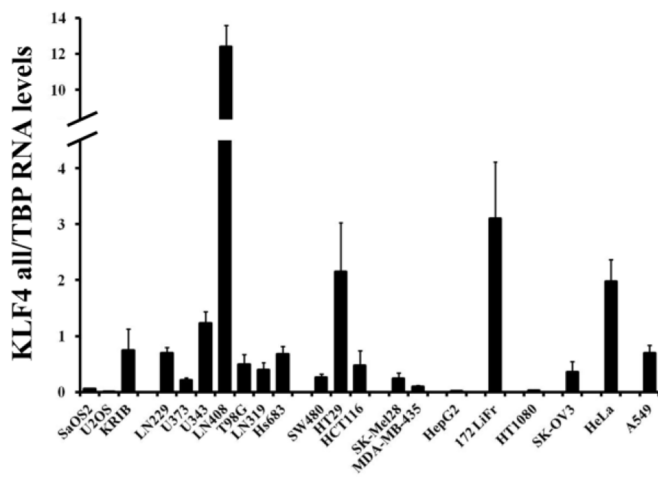**B**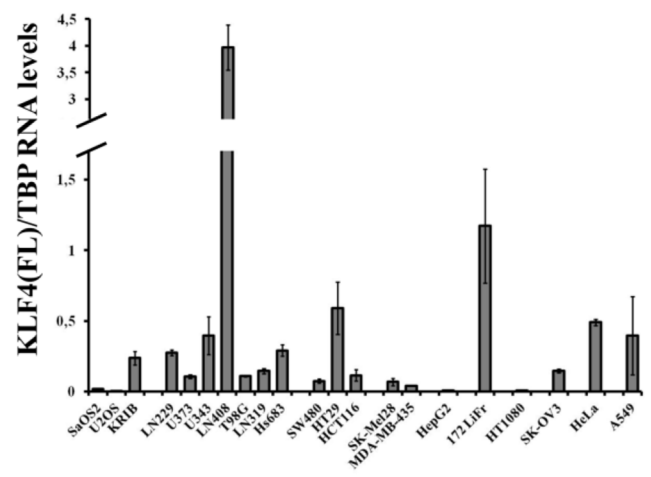**C**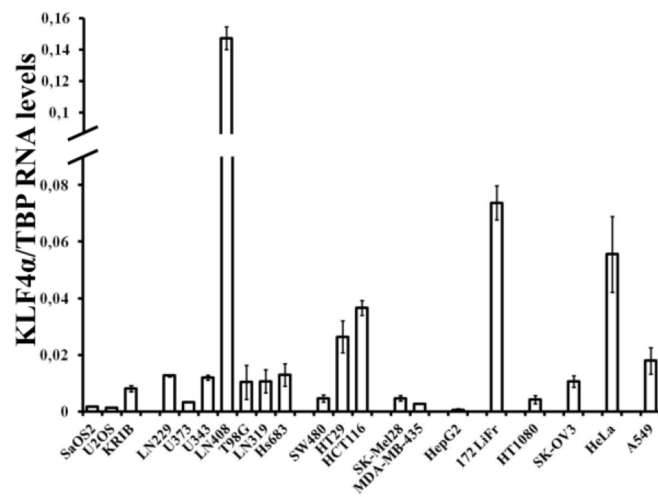**D**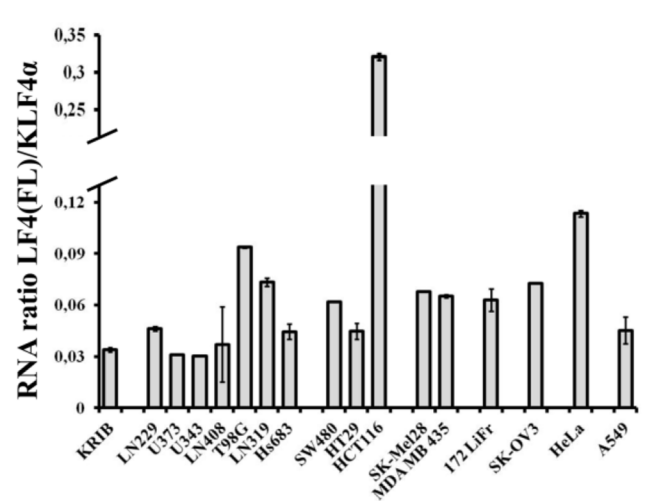

**Supplementary Figure S3: *KLF4α* expression in different cancer cell lines.** A panel of 21 human cancer cell lines was analyzed by qPCR for *KLF4 all* (top left), *KLF4(FL)* (top right), *KLF4α* (bottom left) and the RNA ratio *KLF4α/KLF4(FL)* (bottom right). In most of the cell lines (except for SaOS2, U2OS, HepG2) *KLF4α* was detectable. Levels of *KLF4(FL)* and *KLF4α*, as well as the resulting *KLF4α/KLF4(FL)* ratio vary across the cell lines analyzed. TBP: TATA-Box binding protein.

## TissueScan: Clinical data

### Breast

| ID | gender | age | appearance | diagnosis             | stage  | normal | tumor | stroma | necrosis |
|----|--------|-----|------------|-----------------------|--------|--------|-------|--------|----------|
| N  | F      | 47  | Normal     |                       | Normal | 100    | 0     | 0      | 0        |
| T1 | F      | 52  | Tumor      | ductal Adenocarcinoma | IIA    | 0      | 70    | 30     | 0        |
| T2 | n.a.   | 78  | Tumor      | ductal Adenocarcinoma | IIA    | 0      | 85    | 10     | 5        |
| T3 | F      | 50  | Tumor      | ductal Adenocarcinoma | IIB    | 0      | 85    | 13     | 2        |
| T4 | F      | 55  | Tumor      | ductal Adenocarcinoma | IIIC   | 10     | 80    | 10     | 0        |
| T5 | F      | 68  | Tumor      | ductal Adenocarcinoma | IIIC   | 0      | 90    | 10     | 0        |

### Kidney

| ID | gender | age | appearance | diagnosis                         | stage  | normal | tumor | stroma | necrosis |
|----|--------|-----|------------|-----------------------------------|--------|--------|-------|--------|----------|
| N  | M      | 77  | Normal     |                                   | Normal | 100    | 0     | 0      | 0        |
| T1 | M      | 43  | Tumor      | Carcinoma, renal cell, papillary  | I      | 0      | 75    | 10     | 15       |
| T2 | M      | 64  | Tumor      | Carcinoma, renal cell, papillary  | II     | 0      | 95    | 5      | 0        |
| T3 | M      | 4   | Tumor      | Nephroblastoma                    | II     | 0      | 95    | 0      | 5        |
| T4 | M      | 59  | Tumor      | Carcinoma, renal cell, papillary  | II     | 0      | 70    | 0      | 30       |
| T5 | M      | 59  | Tumor      | Carcinoma, renal cell, clear cell | III    | 0      | 75    | 10     | 15       |

### Lung

| ID | gender | age | appearance | diagnosis               | stage  | normal | tumor | stroma | necrosis |
|----|--------|-----|------------|-------------------------|--------|--------|-------|--------|----------|
| N  | F      | 72  | Normal     |                         | Normal | 100    | 0     | 0      | 0        |
| T1 | F      | 82  | Tumor      | Adenocarcinoma          | IA     | 0      | 40    | 55     | 5        |
| T2 | M      | 65  | Tumor      | Squamous cell carcinoma | IIB    | 10     | 65    | 24     | 1        |
| T3 | M      | 76  | Tumor      | Squamous cell carcinoma | IIIA   | 0      | 60    | 10     | 30       |
| T4 | F      | 46  | Tumor      | Adenocarcinoma          | IV     | 25     | 40    | 35     | 0        |
| T5 | F      | 64  | Tumor      | carcinoid, atypical     | n.a.   | 0      | 90    | 6      | 4        |

### Ovary

| ID | gender | age | appearance | diagnosis                            | stage  | normal | tumor | stroma | necrosis |
|----|--------|-----|------------|--------------------------------------|--------|--------|-------|--------|----------|
| N  | F      | 54  | Normal     |                                      | Normal | 100    | 0     | 0      | 0        |
| T1 | F      | 58  | Tumor      | Adenocarcinoma, endometrioid         | IIB    | 0      | 60    | 15     | 25       |
| T2 | F      | 91  | Tumor      | Adenocarcinoma, papillary serous     | III    | 0      | 90    | 10     | 0        |
| T3 | F      | 49  | Tumor      | Tumor of ovary, mucinous, borderline | IIIA   | 0      | 30    | 70     | 0        |
| T4 | F      | 47  | Tumor      | Adenocarcinoma, clear cell           | IIIC   | 0      | 65    | 35     | 0        |
| T5 | F      | 68  | Tumor      | Adenocarcinoma, serous               | IV     | 10     | 50    | 10     | 30       |

**Supplementary Figure S4: Clinical data of the TissueScans.** A TissueScan of breast, kidney, lung, and ovary cancer patients was used to study RNA levels of *KLF4(FL)* and *KLF4α*. Clinical data of the clinical specimens are summarized. Numbers (last four columns) represent percentage of the indicated tissues.

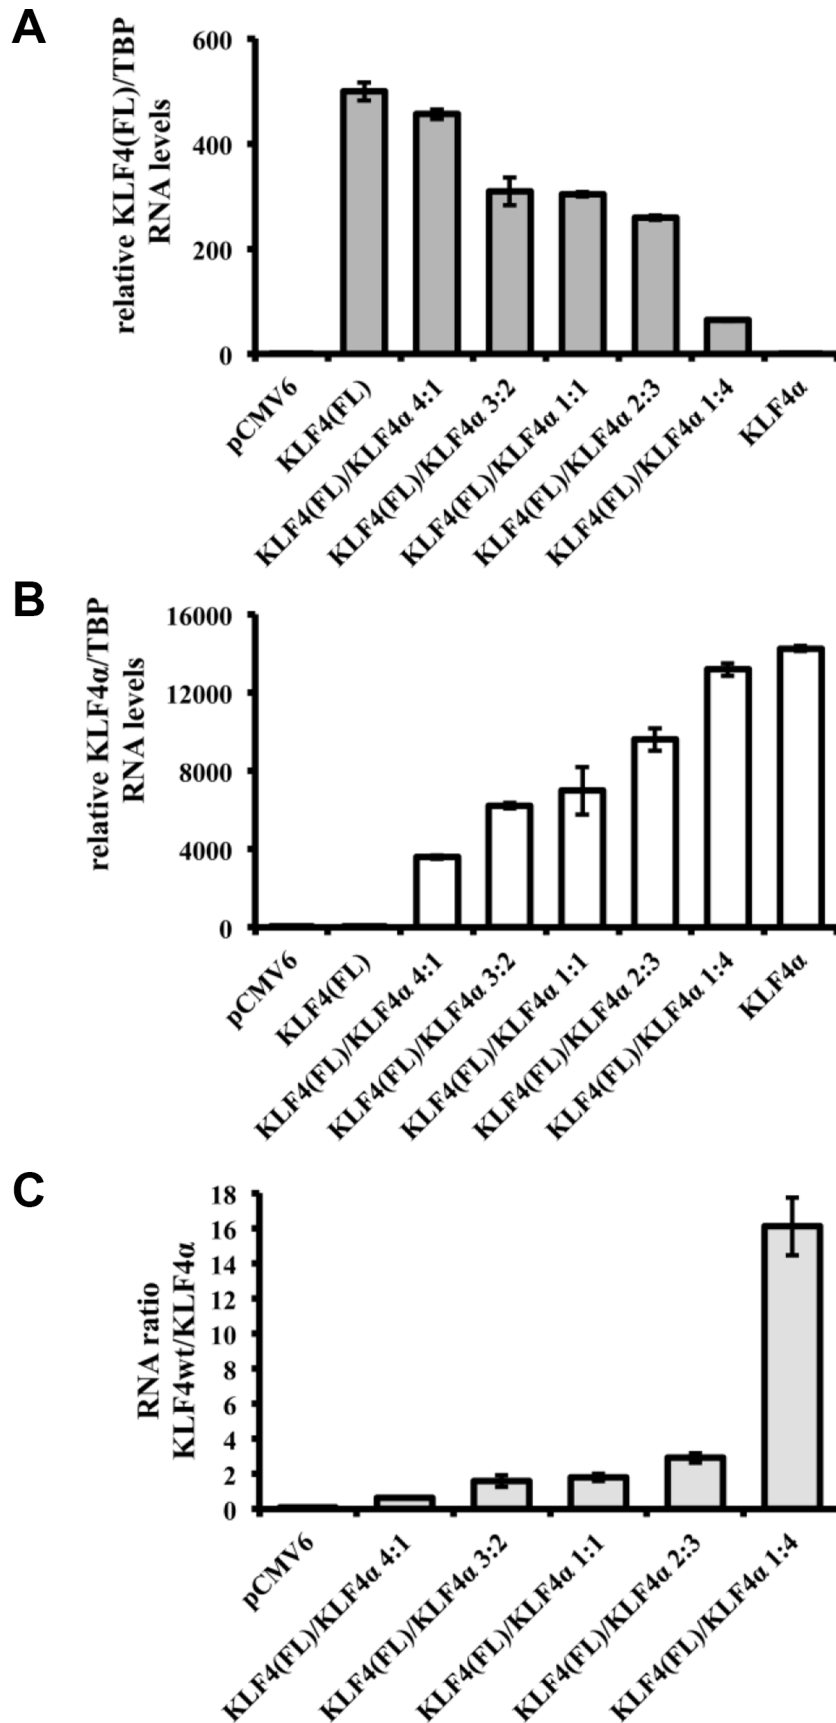

**Supplementary Figure S5: *KLF4(FL)* and *KLF4α* levels in transfected MDA-MB-231 cells.** (A) qPCR analysis of *KLF4(FL)* RNA in MDA-MB-231 cells transfected with different *KLF4(FL)/KLF4α* ratios. (B) qPCR analysis of *KLF4α* levels in MDA-MB-231 cells transfected with different *KLF4(FL)/KLF4α* ratios. (C) Ratio of forced *KLF4(FL)/KLF4α* imbalance in MDA-MB-231 cells. TBP: TATA-Box binding protein.

**Supplementary Table S1: Details of the cell lines used**

| NAME        | ATCC#     | TISSUE     | DISEASE                       | MEDIUM                                                             |
|-------------|-----------|------------|-------------------------------|--------------------------------------------------------------------|
| MCF10A      | CRL-10317 | Breast     |                               | DMEM/F12, Horse serum, cholera toxin, EGF, Hydrocortisone, Insulin |
| MCF7        | HTB-22    | Breast     | adenocarcinoma; ER+           | DMEM                                                               |
| T47D        | HTB-133   | Breast     | ductal carcinoma; ER+, PR+    | DMEM                                                               |
| MDA-MB-175  | HTB-25    | Breast     | ductal carcinoma              | DMEM/F12                                                           |
| MDA-MB-231  | HTB-26    | Breast     | adenocarcinoma; ER+           | DMEM                                                               |
| Saos-2      | HTB-85    | Bone       | osteosarcoma                  | DMEM                                                               |
| U-2 OS      | HTB-96    | Bone       | osteosarcoma                  | DMEM                                                               |
| 143B (KRIB) | CRL-8303  | Bone       | osteosarcoma                  | DMEM                                                               |
| LN229       | CRL-2611  | Brain      | glioblastoma                  | DMEM                                                               |
| U373        | HTB-17    | Brain      | glioblastoma                  | DMEM                                                               |
| U343        |           | Brain      | glioblastoma                  | DMEM                                                               |
| LN408       |           | Brain      | glioblastoma                  | DMEM                                                               |
| T98G        | CRL-1690  | Brain      | glioblastoma                  | DMEM                                                               |
| LN319       |           | Brain      | glioblastoma                  | DMEM/1% glutamine                                                  |
| Hs683       | HTB-138   | Brain      | oligodendroglioma             | DMEM/1% glutamine                                                  |
| SW480       | CCL-228   | Colon      | colorectal adenocarcinoma     | Leibovitz's L15                                                    |
| HT29        | HTB-38    | Colon      | colorectal adenocarcinoma     | McCoy's                                                            |
| HCT116      | CCL-247   | Colon      | colorectal adenocarcinoma     | McCoy's                                                            |
| Sk-Mel-28   | HTB-72    | Skin       | malignant melanoma            | DMEM                                                               |
| MDA-MB-435  | HTB-129   | Skin       | melanoma                      | Leibovitz's L15                                                    |
| 172         |           |            | LiFraumeni (Trp53R172H/R172H) | DMEM                                                               |
| Hep G2      | HB-8065   | Liver      | hepatocellular carcinoma      | EMEM                                                               |
| HT1080      | CCL-121   | Connective | fibrosarcoma                  | DMEM                                                               |
| SK-OV3      | HTB-77    | Ovary      | adenocarcinoma                | McCoy's                                                            |
| HeLa        | CCL-2     | Cervix     | adenocarcinoma                | DMEM                                                               |
| A549        | CCL-185   | Lung       | carcinoma                     | RPMI 1640/glutamine                                                |

**Supplementary Table S2: qPCR primers**

| gene                                                                 | Sequence (5'-3')                               |
|----------------------------------------------------------------------|------------------------------------------------|
| <i>KLF4 all F</i><br><i>KLF4 all R</i>                               | CAAGCCAAAGAGGGGAAGAC<br>CGTCCCAGTCACAGTGGTAA   |
| <i>KLF4(FL) F</i><br><i>KLF4(FL) R</i>                               | GAGAAGACACTGCGTCAAGC<br>AGTCGCTTCATGTGGGAGA    |
| <i>KLF4<math>\alpha</math> F</i><br><i>KLF4<math>\alpha</math> R</i> | GTGCCCCGAATAACAGCTCA<br>ACGATCGTCTTCCCCTCTTT   |
| <i>p21<sup>Cip1</sup> F</i><br><i>p21<sup>Cip1</sup> R</i>           | TGGAGACTCTCAGGGTCGAAA<br>CGGCGTTTGGAGTGGTAGAA  |
| <i>p27<sup>Kip1</sup> F</i><br><i>p27<sup>Kip1</sup> R</i>           | CCGGTGGACCACGAAGAGT<br>GCTCGCCTCTTCCATGTCTC    |
| <i>CDH1 F</i><br><i>CDH1 R</i>                                       | AGAACGCATTGCCACATACT<br>TCTGATCGGTTACCGTGATCAA |
| <i>TBP F</i><br><i>TBP R</i>                                         | TGCACAGGAGCCAAGAGTGAA<br>CACATCACAGCTCCCCACCA  |

F: forward; R: reverse.
